# Supplementary material for: Cyclic dinucleotide detection with riboswitch–G-quadruplex hybrid
Source: Royal Society of Chemistry journal article supplement (doi:10.1039/c5mb00751h), 2015-12-21
Supplement: c5mb00751h1.pdf [file c5mb00751h1.pdf]

## Supplementary Information

Cyclic dinucleotide detection with riboswitch-G-quadruplex hybrid

Genichiro Tsuji<sup>a,b</sup> and Herman O. Sintim<sup>a,b,c\*</sup>

<sup>a</sup>Department of Chemistry and Biochemistry, University of Maryland, College Park, MD 20742, US.

<sup>b</sup>Present address: Department of Chemistry, Purdue University, 560 Oval Drive, West Lafayette, IN 47907, US.

<sup>c</sup>Center for Drug Discovery, Purdue University, West Lafayette, IN 47907, US.

Email: [hsintim@purdue.edu](mailto:hsintim@purdue.edu)

### Experimental Section:

RNA sequences used in this study (5' to 3'):

#### **F3-ST1Asym**

GGGUAGGGUUGGGG**GCC**GCACAGGGCAAACCAUUCGAAAGAGUGGGACGC  
AAAGCCUCCGGCCUAAACUUCGGUAGGUAGCGGGGUUACC**GAGCC**GGG

Length : 98 mer

Molar excitation coefficient (260 nm) : 1106200 mol<sup>-1</sup> L cm<sup>-1</sup>

#### **F3-ST2Asym**

GGGUAGGGUUGGGG**CUC**GCACAGGGCAAACCAUUCGAAAGAGUGGGACGC  
AAAGCCUCCGGCCUAAACUUCGGUAGGUAGCGGGGUUACC**GAGCC**GGG

Length : 97 mer

Molar excitation coefficient (260 nm) : 1096900 mol<sup>-1</sup> L cm<sup>-1</sup>

#### **F3-ST3Asym**

GGGUAGGGUUGGGG**CUC**GCACAGGGCAAACCAUUCGAAAGAGUGGGACGCAAAGC  
CUCCGGCCUAAACUUCGGUAGGUAGCGGGGUUACC**GGG**CGGG

Length: 97 mer

Molar excitation coefficient (260 nm) : 1093200 mol<sup>-1</sup> L cm<sup>-1</sup>

#### **F3-ST1Sym**

GGGUAGGGG**GCC**GCACAGGGCAAACCAUUCGAAAGAGUGGGACGCAAAGCC  
UCCGGCCUAAACUUCGGUAGGUAGCGGGGUUACC**GAGCC**GGGUUGGG

Length : 98 mer

Molar excitation coefficient (260 nm) : 1106200 mol<sup>-1</sup> L cm<sup>-1</sup>

**F3-ST2Sym**

GGGUAGGGG**CUC**GCACAGGGCAAACCAUUCGAAAGAGUGGGACGCAAAGCCUCC  
GGCCUAAACUUCGGUAGGUAGCGGGGUUACC**GAG**CGGGUUGGG

Length : 97 mer

Molar excitation coefficient (260 nm) : 1096900 mol<sup>-1</sup> L cm<sup>-1</sup>

**F3-ST3Sym**

GGGUAGGGG**CUC**GCACAGGGCAAACCAUUCGAAAGAGUGGGACGCAAAGCCUCC  
GGCCUAAACUUCGGUAGGUAGCGGGGUUACC**GGG**CGGGUUGGG

Length : 97 mer

Molar excitation coefficient (260 nm) : 1093200 mol<sup>-1</sup> L cm<sup>-1</sup>

**F3-ST4Sym**

GGGUAGGGG**CAC**GCACAGGGCAAACCAUUCGAAAGAGUGGGACGCAAAGCC  
UCCGGCCUAAACUUCGGUAGGUAGCGGGGUUACC**GUG**CGGGUUGGG

Length : 97 mer

Molar excitation coefficient (260 nm) : 1109900 mol<sup>-1</sup> L cm<sup>-1</sup>

**F3-ST5Sym**

GGGUAGGGG**CAG**GCACAGGGCAAACCAUUCGAAAGAGUGGGACGCAAAGCCUCC  
GGCCUAAACUUCGGUAGGUAGCGGGGUUACC**CUG**CGGGUUGGG

Length : 97 mer

Molar excitation coefficient (260 nm) : 1109900 mol<sup>-1</sup> L cm<sup>-1</sup>

**F3-ST6Sym**

GGGUAGGGG**ACUC**GCACAGGGCAAACCAUUCGAAAGAGUGGGACGCAAAGCCUCC  
GGCCUAAACUUCGGUAGGUAGCGGGGUUACC**GAGU**CGGGUUGGG

Length : 99 mer

Molar excitation coefficient (260 nm) : 1122200 mol<sup>-1</sup> L cm<sup>-1</sup>

**F3-ST7Sym**

GGGUAGGGG**GCUC**GCACAGGGCAAACCAUUCGAAAGAGUGGGACGCAAAGCCUCC  
GGCCUAAACUUCGGUAGGUAGCGGGGUUACC**GAGC**CGGGUUGGG

Length : 99 mer

Molar excitation coefficient (260 nm) : 1116100 mol<sup>-1</sup> L cm<sup>-1</sup>

**F2-ST2Sym**

GGUAGGG**CUC**GCACAGGGCAAACCAUUCGAAAGAGUGGGACGCAAAGCCUCC  
GGCCUAAACUUCGGUAGGUAGCGGGGUUACC**GAG**CGGUUGG

Length : 93 mer

Molar excitation coefficient (260 nm) : 1050100 mol<sup>-1</sup> L cm<sup>-1</sup>

**F2-ST5Sym**

GGUAGGG**CUC**GCACAGGGCAAACCAUUCGAAAGAGUGGGACGCAAAGCCUCC  
GGCCUAAACUUCGGUAGGUAGCGGGGUUACC**GGG**CGGUUGG

Length : 93 mer

Molar excitation coefficient (260 nm) : 1046400 mol<sup>-1</sup> L cm<sup>-1</sup>
